# Supplementary material for: ‘You can't be a person and a doctor’: the work–life balance of doctors in training—a qualitative study
Source: PubMed Central journal article supplement — BMJ Open. 2016 Dec 2;6(12):e013897. doi: 10.1136/bmjopen-2016-013897 (PMC5168633; doi:10.1136/bmjopen-2016-013897), 2016-12-02
Supplement: bmjopen-2016-013897supp2.pdf [file bmjopen-2016-013897supp2.pdf]

Consolidated criteria for reporting qualitative studies (COREQ): 32-item checklist

| No                                                     | Item                                     | Guide questions/description                                                                                                              |
|--------------------------------------------------------|------------------------------------------|------------------------------------------------------------------------------------------------------------------------------------------|
| <b>Domain 1:<br/>Research team<br/>and reflexivity</b> |                                          |                                                                                                                                          |
| Personal Characteristics                               |                                          |                                                                                                                                          |
| 1.                                                     | Interviewer/facilitator                  | AR, RV, KW, SN                                                                                                                           |
| 2.                                                     | Credentials                              | D.Psych (Health), PhD, PhD, medical doctor (MBBS)                                                                                        |
| 3.                                                     | Occupation                               | Research Associate, Research Associate, Senior Lecturer, Clinical Teaching Fellow                                                        |
| 4.                                                     | Gender                                   | All female                                                                                                                               |
| 5.                                                     | Experience and training                  | RV, AR, KW had previous experience of interviewing for qualitative research. SN was provided with training for the study.                |
| Relationship with participants                         |                                          |                                                                                                                                          |
| 6.                                                     | Relationship established                 | No                                                                                                                                       |
| 7.                                                     | Participant knowledge of the interviewer | Participants knew that all researchers worked for UCL, their job titles and their role within the study                                  |
| 8.                                                     | Interviewer characteristics              | Interviewers' professional backgrounds are provided in the paper and a paragraph regarding reflexivity is provided in the discussion.    |
| <b>Domain 2:<br/>study design</b>                      |                                          |                                                                                                                                          |
| Theoretical framework                                  |                                          |                                                                                                                                          |
| 9.                                                     | Methodological orientation and Theory    | Thematic analysis                                                                                                                        |
| Participant selection                                  |                                          |                                                                                                                                          |
| 10.                                                    | Sampling                                 | Purposive                                                                                                                                |
| 11.                                                    | Method of approach                       | Email and face-to-face                                                                                                                   |
| 12.                                                    | Sample size                              | 137                                                                                                                                      |
| 13.                                                    | Non-participation                        | None of the participants dropped out or refused, although many did not respond to the initial email inviting participation in the study. |

| No                                         | Item                           | Guide questions/description                                                                                                                                                                                                                                                                                                                                                                  |
|--------------------------------------------|--------------------------------|----------------------------------------------------------------------------------------------------------------------------------------------------------------------------------------------------------------------------------------------------------------------------------------------------------------------------------------------------------------------------------------------|
| Setting                                    |                                |                                                                                                                                                                                                                                                                                                                                                                                              |
| 14.                                        | Setting of data collection     | Hospitals, training course venues, universities                                                                                                                                                                                                                                                                                                                                              |
| 15.                                        | Presence of non-participants   | None                                                                                                                                                                                                                                                                                                                                                                                         |
| 16.                                        | Description of sample          | Demographics including ethnicity, gender, specialty, location, primary medical qualification (see Table 1 for details). Data collection took place between October and December, 2015.                                                                                                                                                                                                       |
| Data collection                            |                                |                                                                                                                                                                                                                                                                                                                                                                                              |
| 17.                                        | Interview guide                | The research team developed a focus group and interview schedule. These were piloted on two junior doctors.                                                                                                                                                                                                                                                                                  |
| 18.                                        | Repeat interviews              | None                                                                                                                                                                                                                                                                                                                                                                                         |
| 19.                                        | Audio/visual recording         | Audio recordings                                                                                                                                                                                                                                                                                                                                                                             |
| 20.                                        | Field notes                    | Yes notes were made during the focus groups and interview.                                                                                                                                                                                                                                                                                                                                   |
| 21.                                        | Duration                       | Interviews were approximately between 30-40 minutes and focus groups about 1 hour.                                                                                                                                                                                                                                                                                                           |
| 22.                                        | Data saturation                | No                                                                                                                                                                                                                                                                                                                                                                                           |
| 23.                                        | Transcripts returned           | Not as a rule. One participant reviewed his transcript as he was concerned about some of his comments being used in analysis due to apprehension about others recognizing his identity.                                                                                                                                                                                                      |
| <b>Domain 3:<br/>analysis and findings</b> |                                |                                                                                                                                                                                                                                                                                                                                                                                              |
| Data analysis                              |                                |                                                                                                                                                                                                                                                                                                                                                                                              |
| 24.                                        | Number of data coders          | 4                                                                                                                                                                                                                                                                                                                                                                                            |
| 25.                                        | Description of the coding tree | Authors developed a coding framework. Themes relevant to work-life balance are provided in the results. This is a sub-analysis of a wider study and themes and sub-themes for the wider analysis can be found elsewhere<br><a href="http://www.gmc-uk.org/2016_04_28_FairPathwaysFinalReport.pdf_66939685.pdf">http://www.gmc-uk.org/2016_04_28_FairPathwaysFinalReport.pdf_66939685.pdf</a> |
| 26.                                        | Derivation of themes           | Themes were both identified in advance and derived from the data. The framework of Mountford-Zimdars et al. was used as a guide, but the researchers also allowed the themes to emerge from the data.                                                                                                                                                                                        |
| 27.                                        | Software                       | NVivo 10.                                                                                                                                                                                                                                                                                                                                                                                    |
| 28.                                        | Participant checking           | No, although all have been sent a copy of the final report and some have replied to say thank you and that they found it interesting.                                                                                                                                                                                                                                                        |

| No        | Item                         | Guide questions/description                                                                                                                                                                                                                                                                                                                                                                                                                                                                                                                                                                           |
|-----------|------------------------------|-------------------------------------------------------------------------------------------------------------------------------------------------------------------------------------------------------------------------------------------------------------------------------------------------------------------------------------------------------------------------------------------------------------------------------------------------------------------------------------------------------------------------------------------------------------------------------------------------------|
| Reporting |                              |                                                                                                                                                                                                                                                                                                                                                                                                                                                                                                                                                                                                       |
| 29.       | Quotations presented         | Yes we have used quotations to illustrate the themes and participants are identified by the following demographic characteristics: Trainee or Trainer, Stage of training (if trainee), ethnicity, country of primary medical qualification, gender and specialty.                                                                                                                                                                                                                                                                                                                                     |
| 30.       | Data and findings consistent | Yes. We have a large amount of from this study, with 137 participants. This paper focuses on the finding in relation to work-life balance, which emerged from the results as an area of significance to trainees. The findings in relation to the research questions around differential attainment have been published in a report for the General Medical Council and a paper for BMJ Open. Other important areas to emerge include the validity of workplace based assessments, and protective and risk processes influencing training progression, which have also be written up for publication. |
| 31.       | Clarity of major themes      | Yes                                                                                                                                                                                                                                                                                                                                                                                                                                                                                                                                                                                                   |
| 32.       | Clarity of minor themes      | Yes                                                                                                                                                                                                                                                                                                                                                                                                                                                                                                                                                                                                   |
